# Supplementary material
Source: Springer Nature journal article supplement (https://www.springermedizin.de/resource/supplementary/12916_2013_927_MOESM4_ESM.pdf/9598882)

**KEY**

- Immediate effect
- Long-term effect
- Inter-generational effect

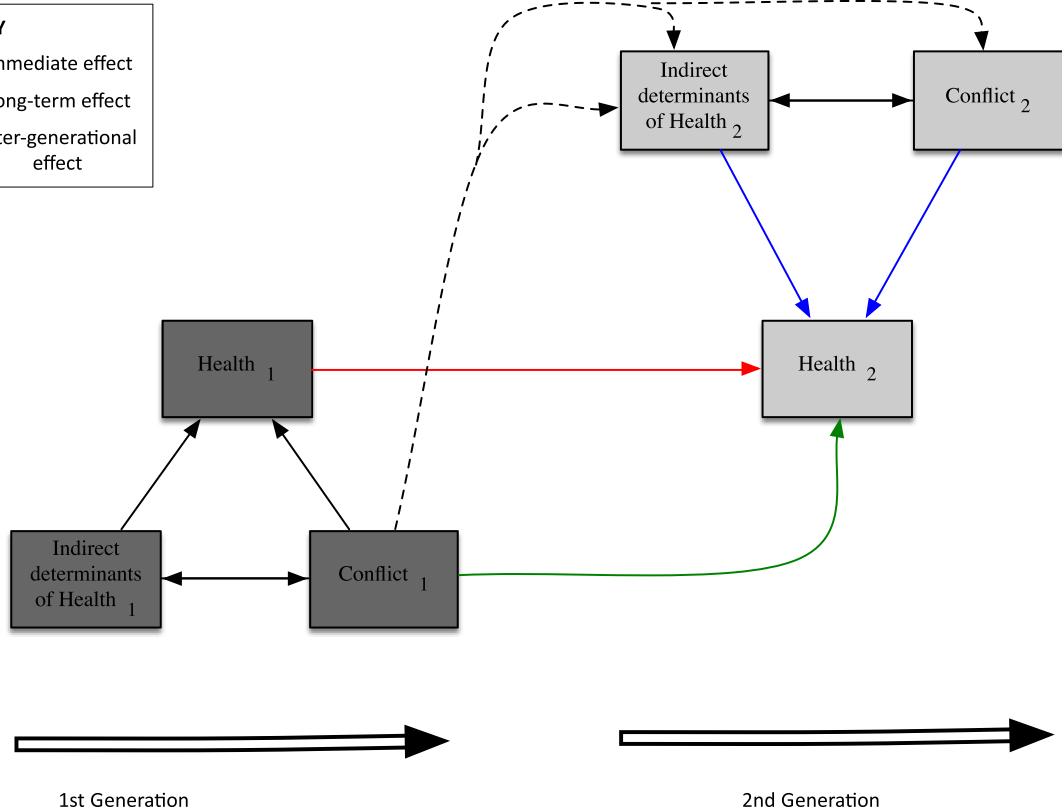

Supplement: MOESM4 [file 9598882]
